# Supplementary material for: A D-2-hydroxyglutarate dehydrogenase mutant reveals a critical role for ketone body metabolism in Caenorhabditis elegans development
Source: PubMed Central journal article supplement (PMC10096224; doi:10.1371/journal.pbio.3002057), 2023-04-12

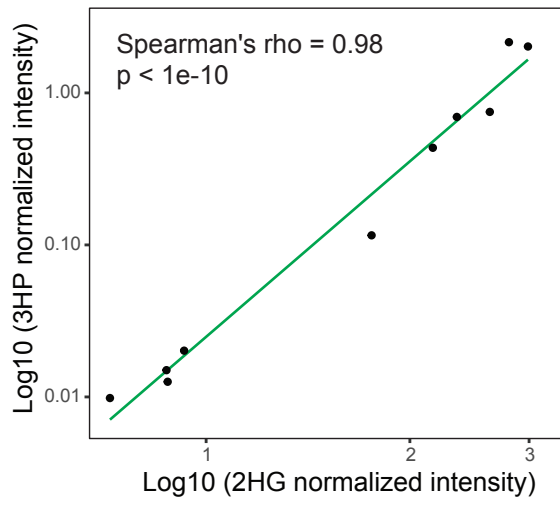

Supplement: pbio.3002057.s005.pdf [file pbio.3002057.s005.pdf]
